# Supplementary material
Source: PubMed Central journal article supplement (PMC2376224)
Supplement: jbc_M709776200_1.pdf [file jbc_M709776200_1.pdf]

### **Supplementary Table 1 Legend:**

All differentially expressed genes are sorted by fold change. Also shown is the gene symbol for each gene. More information about each gene, including common names, can be obtained by entering the gene symbol in the Mouse Genome Informatics (MGI 3.54) web site. The NCBI Reference Sequence ID, or Accession number for each gene is shown. All genes were sorted into Gene Ontology Biological Process categories. Several of the categories were found to be of interest and the numbers in the Notes column refer to genes assigned to the following groupings of Gene Ontology Biological Process categories:

- 1 = regulation of transcription, DNA-dependent (GO ID 0006355)
- 2 = protein folding, response to unfolded protein, ER overload response (GO IDs 0006457, 0006986, 0006983)
- 3 = small GTPase mediated signal transduction (GO ID 0007264)
- 4 = negative regulation of apoptosis (GO ID 0043066)
- 5 = cell death (GO IDs 0012501, 0008219)
- 6 = negative regulators of cell growth (GO IDs 0030308, 0008285, 0001558)
- 7 = fatty acid and glucose metabolism (GO IDs 0008152, 0015758, 0006094, 0006631)

Known and putative ERSR genes are designated by \* and #, respectively.

**Supplemental Table 1: Complete List of Genes Induced by ATF6**

| Number | Gene Symbol   | RefSeq Transcript ID | Fold Change | Notes |
|--------|---------------|----------------------|-------------|-------|
| 1      | Mlstcd2       | NM_026143            | 120.90      |       |
| 2      | Spp1          | NM_009263            | 91.47       | 4     |
| 3      | Polr3k        | NM_025901            | 69.92       | 1     |
| 4      | Alkbh2        | NM_175016            | 47.45       |       |
| 5      | Ptx3          | NM_008987            | 46.31       | #     |
| 6      | Smad3         | NM_011418            | 44.98       | 1, 6  |
| 7      | Psat1         | NM_177420            | 40.77       | 7     |
| 8      | Il6           | NM_031168            | 38.45       | 4, #  |
| 9      | Myc           | NM_010849            | 35.36       | 1     |
| 10     | Slc15a3       | NM_023044            | 30.96       |       |
| 11     | Cxcl1         | NM_008176            | 25.21       |       |
| 12     | Mthfd2        | NM_008638            | 22.45       |       |
| 13     | Clec4e        | NM_019948            | 22.34       |       |
| 14     | Ccl2          | NM_011333            | 21.74       | 4     |
| 15     | Cxcl5         | NM_009141            | 21.56       |       |
| 16     | Vcan          | NM_001081249         | 21.45       |       |
| 17     | Sycp2         | NM_177191            | 21.11       |       |
| 18     | Tk1           | NM_009387            | 20.57       |       |
| 19     | Cdkn1a        | NM_007669            | 20.43       | 4, 6  |
| 20     | Derl3         | NM_024440            | 18.50       | *     |
| 21     | Sdf2l1        | NM_022324            | 17.41       | #     |
| 22     | Pdia4         | NM_009787            | 16.37       | *     |
| 23     | Ccl12         | NM_011331            | 14.03       |       |
| 24     | Dnajc3a       | NM_008929            | 12.75       | 2, *  |
| 25     | Dnajb11       | NM_026400            | 12.39       | 2, *  |
| 26     | Ccl7          | NM_013654            | 12.03       |       |
| 27     | EG574437      | NM_001081643         | 11.90       |       |
| 28     | Rcc2          | NM_173867            | 11.71       |       |
| 29     | Pscdbp        | NM_139200            | 11.54       |       |
| 30     | Chi3l3        | NM_009892            | 11.44       |       |
| 31     | Evi2b         | NM_001077496         | 11.40       |       |
| 32     | Pycr1         | NM_144795            | 10.82       |       |
| 33     | AW011738      | XM_001001227         | 10.56       |       |
| 34     | Plcx2         | XM_001000738         | 10.55       |       |
| 35     | Gadd45g       | NM_011817            | 10.52       | #     |
| 36     | EG668771      | NM_016966            | 10.30       | 7     |
| 37     | Nr4a3         | NM_015743            | 10.23       | 1     |
| 38     | 2700038G22Rik | XM_899866            | 10.11       |       |
| 39     | 1700012G19Rik | NM_025954            | 10.09       | 7     |
| 40     | Arid4a        | NM_001081195         | 10.08       |       |
| 41     | LOC669660     | XM_976375            | 9.86        |       |
| 42     | Socs3         | NM_007707            | 9.68        | *     |
| 43     | Eif1a         | NM_010120            | 9.66        |       |
| 44     | Pthr1         | NM_178595            | 9.63        |       |
| 45     | Slc7a5        | NM_011404            | 9.57        |       |
| 46     | Appl1         | NM_145221            | 9.31        |       |
| 47     | Tspyl2        | NM_029836            | 9.29        | 1     |

|    |               |              |      |      |
|----|---------------|--------------|------|------|
| 48 | Rtn4          | NM_024226    | 9.28 | #    |
| 49 | Asns          | NM_012055    | 9.26 | 7, * |
| 50 | P4hb          | NM_011032    | 9.17 | 2, * |
| 51 | BB414484      | ---          | 8.92 |      |
| 52 | Cd44          | NM_001039150 | 8.86 |      |
| 53 | Mlit3         | NM_027326    | 8.67 | 1    |
| 54 | Arf2          | NM_007477    | 8.52 | 3    |
| 55 | 2610207I05Rik | NM_001031814 | 8.45 |      |
| 56 | Cks1b         | NM_016904    | 8.28 |      |
| 57 | A1848100      | XM_917085    | 8.23 |      |
| 58 | ARMET         | NM_029103    | 8.21 | *    |
| 59 | Chac1         | NM_026929    | 8.07 |      |
| 60 | Lrrc49        | NM_145616    | 7.88 |      |
| 61 | Ears2         | NM_026140    | 7.84 |      |
| 62 | Timp1         | NM_001044384 | 7.78 |      |
| 63 | D5Ert593e     | NM_175096    | 7.56 |      |
| 64 | I11rn         | NM_001039701 | 7.53 |      |
| 65 | Eda2r         | NM_175540    | 7.46 | 5    |
| 66 | Thbs1         | NM_011580    | 7.23 |      |
| 67 | Hspa14        | NM_001037542 | 7.16 |      |
| 68 | Hsp90b1       | NM_011631    | 7.07 | 2, * |
| 69 | Ccr2          | NM_009915    | 6.93 |      |
| 70 | Ilgam         | NM_001082960 | 6.88 |      |
| 71 | Tnfrsf12a     | NM_013749    | 6.78 | 5    |
| 72 | Hn1l          | NM_198937    | 6.77 |      |
| 73 | Phgdh         | NM_016966    | 6.73 |      |
| 74 | Trib3         | NM_144554    | 6.64 | 1, * |
| 75 | Mxd1          | NM_010751    | 6.47 | 1    |
| 76 | Dbf4          | NM_013726    | 6.44 |      |
| 77 | Kpnb1         | NM_008379    | 6.42 |      |
| 78 | Hmox1         | NM_010442    | 6.40 |      |
| 79 | Sptlc2        | NM_011479    | 6.31 |      |
| 80 | Sel1l         | NM_001039089 | 6.30 |      |
| 81 | Zwint         | NM_025635    | 6.28 |      |
| 82 | D16Ert472e    | NM_025967    | 6.26 |      |
| 83 | Cdk2ap2       | NM_026373    | 6.16 |      |
| 84 | 2810474O19Rik | NM_026054    | 6.05 |      |
| 85 | S100a4        | NM_011311    | 5.99 |      |
| 86 | Azin1         | NM_018745    | 5.96 | #    |
| 87 | Gas5          | NR_002840    | 5.90 | #    |
| 88 | Saa3          | NM_011315    | 5.82 |      |
| 89 | Tubb3         | NM_023279    | 5.80 |      |
| 90 | Zmynd19       | NM_026021    | 5.76 |      |
| 91 | Tubb2b        | NM_009450    | 5.58 |      |
| 92 | Chka          | NM_001025566 | 5.46 |      |
| 93 | Edem1         | NM_138677    | 5.36 | 2, * |
| 94 | Relb          | NM_009046    | 5.35 | 1, 4 |
| 95 | Fem1b         | NM_010193    | 5.33 | 1    |
| 96 | LOC433261     | NM_019768    | 5.32 | 1    |
| 97 | Aldh1a2       | NM_009022    | 5.31 | 7    |

|     |               |              |      |         |
|-----|---------------|--------------|------|---------|
| 98  | Ebp           | NM_007898    | 5.29 |         |
| 99  | Calr          | NM_007591    | 5.29 | 2, *    |
| 100 | G530011O06Rik | NM_001039559 | 5.22 |         |
| 101 | Trim37        | NM_197987    | 5.21 |         |
| 102 | Kcnq1         | NM_008434    | 5.14 |         |
| 103 | Morf4l2       | NM_019768    | 5.10 | 1       |
| 104 | Ints3         | NM_145540    | 5.09 |         |
| 105 | BC013529      | NM_145418    | 5.08 |         |
| 106 | Xpo1          | NM_001035226 | 5.07 |         |
| 107 | Ubfd1         | NM_138589    | 5.05 |         |
| 108 | Uck2          | NM_030724    | 5.03 |         |
| 109 | Cd52          | NM_013706    | 5.02 |         |
| 110 | Rbm15b        | NM_175402    | 4.99 |         |
| 111 | Cxcr6         | NM_030712    | 4.95 |         |
| 112 | Rras2         | NM_025846    | 4.95 | 3       |
| 113 | Cxcl2         | NM_009140    | 4.94 |         |
| 114 | Atf4          | NM_009716    | 4.93 | 1, 7, * |
| 115 | Strbp         | NM_009261    | 4.90 |         |
| 116 | Dph5          | NM_027193    | 4.85 | 7       |
| 117 | Ncam1         | NM_001081445 | 4.81 |         |
| 118 | Aldh18a1      | NM_019698    | 4.80 |         |
| 119 | Ckap4         | NM_175451    | 4.80 |         |
| 120 | Gm879         | NM_001034874 | 4.80 |         |
| 121 | EG627828      | NM_146130    | 4.78 |         |
| 122 | Tmem158       | NM_001002267 | 4.78 |         |
| 123 | Ms4a6d        | NM_022431    | 4.76 |         |
| 124 | Tgfb1         | NM_009369    | 4.76 |         |
| 125 | Idi1          | NM_145360    | 4.75 |         |
| 126 | Pdia3         | NM_007952    | 4.72 | *       |
| 127 | Hspa5         | NM_022310    | 4.71 | 2, 4, * |
| 128 | Gdf15         | NM_011819    | 4.65 |         |
| 129 | Col3a1        | NM_009930    | 4.64 |         |
| 130 | Zfp697        | NM_172863    | 4.64 |         |
| 131 | Syvn1         | NM_028769    | 4.60 | 2, 4, * |
| 132 | Elk1          | NM_007922    | 4.57 | 1       |
| 133 | Ms4a4c        | NM_029499    | 4.57 |         |
| 134 | Plac8         | NM_139198    | 4.56 |         |
| 135 | Kif5b         | NM_008448    | 4.55 |         |
| 136 | Nans          | NM_053179    | 4.53 | 7       |
| 137 | Actr3         | NM_023735    | 4.51 |         |
| 138 | Tnrc15        | NM_146112    | 4.49 |         |
| 139 | Snord22       | NR_002896    | 4.48 | #       |
| 140 | Nola2         | NM_026631    | 4.44 |         |
| 141 | Gas2l3        | NM_001033331 | 4.35 |         |
| 142 | Ppp1r3d       | NM_001085501 | 4.33 |         |
| 143 | Fhl1          | NM_001077361 | 4.33 |         |
| 144 | Bex1          | NM_009052    | 4.33 |         |
| 145 | Txnrd1        | NM_001042513 | 4.32 | #       |
| 146 | Usp1          | NM_146144    | 4.31 |         |
| 147 | Map3k3        | NM_011947    | 4.29 |         |

|     |               |              |      |         |
|-----|---------------|--------------|------|---------|
| 148 | RCAN1         | NM_001081549 | 4.29 | #       |
| 149 | Arntl         | NM_007489    | 4.27 | 1       |
| 150 | Snap23        | NM_009222    | 4.23 |         |
| 151 | 2810026P18Rik | XM_925560    | 4.22 |         |
| 152 | Senp2         | NM_029457    | 4.19 | 1       |
| 153 | Tbcb          | NM_025548    | 4.19 | 2       |
| 154 | Eif2ak3       | NM_010121    | 4.18 | 2, *    |
| 155 | Tes           | NM_011570    | 4.14 |         |
| 156 | Nde1          | NM_023317    | 4.12 |         |
| 157 | Pin1          | NM_023371    | 4.12 | 2, *    |
| 158 | 2610036L11Rik | XM_488549    | 4.11 |         |
| 159 | 4932431P20Rik | NM_001033230 | 4.08 | 1       |
| 160 | BC049807      | NM_001002008 | 4.08 | 1       |
| 161 | Fem1c         | NM_173423    | 4.07 | 1       |
| 162 | Tubb2c        | NM_146116    | 4.07 |         |
| 163 | Pgk1          | NM_008828    | 4.04 |         |
| 164 | Itgb1bp3      | NM_027120    | 4.03 |         |
| 165 | Cd53          | NM_007651    | 4.03 |         |
| 166 | Smc2          | NM_008017    | 4.02 |         |
| 167 | D14Wsu89e     | NM_001081039 | 4.01 |         |
| 168 | Slc16a6       | NM_001029842 | 3.98 |         |
| 169 | Hyou1         | NM_021395    | 3.86 | 2, *    |
| 170 | Rnd1          | NM_172612    | 3.84 | 3       |
| 171 | Ugcgl1        | NM_198899    | 3.70 | *       |
| 172 | Egr1          | NM_007913    | 3.67 | 1       |
| 173 | Ikbkg         | NM_010547    | 3.57 | 1       |
| 174 | Pcdh7         | NM_018764    | 3.55 |         |
| 175 | Hn1           | NM_008258    | 3.53 |         |
| 176 | Prkg1         | NM_001013833 | 3.51 |         |
| 177 | Rrp12         | NM_199447    | 3.45 |         |
| 178 | Uchl1         | NM_011670    | 3.40 |         |
| 179 | Wfs1          | NM_011716    | 3.38 |         |
| 180 | Wdr68         | NM_027946    | 3.34 |         |
| 181 | Coro1a        | NM_009898    | 3.29 |         |
| 182 | Vcp           | NM_009503    | 3.29 |         |
| 183 | Rhpn2         | NM_027897    | 3.26 |         |
| 184 | Ppp1r14b      | NM_008889    | 3.25 |         |
| 185 | Tuba1c        | NM_009448    | 3.24 |         |
| 186 | Rala          | NM_019491    | 3.18 | 3       |
| 187 | Hagh          | NM_024284    | 3.14 |         |
| 188 | Mesdc2        | NM_023403    | 3.14 |         |
| 189 | Pnpo          | NM_134021    | 3.10 |         |
| 190 | Serpinh1      | NM_009825    | 3.10 | 2, #    |
| 191 | Cotl1         | NM_028071    | 3.08 |         |
| 192 | Frzb          | NM_011356    | 3.07 |         |
| 193 | Rabepk        | NM_145522    | 3.07 |         |
| 194 | Ptpn14        | NM_001033287 | 3.05 |         |
| 195 | Cyb5r3        | NM_029787    | 3.02 |         |
| 196 | Eif2s2        | NM_026030    | 3.02 |         |
| 197 | Gsk3b         | NM_019827    | 3.00 | 2, 4, # |

|     |               |              |      |      |
|-----|---------------|--------------|------|------|
| 198 | Arid5b        | NM_023598    | 3.00 | 1    |
| 199 | 1700040I03Rik | NM_028505    | 2.99 |      |
| 200 | 2700049P18Rik | NM_175382    | 2.98 |      |
| 201 | Prmt2         | NM_001077638 | 2.98 |      |
| 202 | 1110014K08Rik | NM_176902    | 2.98 |      |
| 203 | Bola2         | NM_175103    | 2.96 |      |
| 204 | Efnb2         | NM_010111    | 2.96 |      |
| 205 | Mcm5          | NM_008566    | 2.95 | 1    |
| 206 | Xbp1          | NM_013842    | 2.95 | 1, * |
| 207 | Prpf40a       | NM_018785    | 2.94 |      |
| 208 | Finc          | NM_001081185 | 2.91 |      |
| 209 | Dlgap4        | NM_001042487 | 2.91 |      |
| 210 | Sfpq          | NM_023603    | 2.91 | 1    |
| 211 | Nol12         | NM_133800    | 2.89 |      |
| 212 | Dpy19l1       | NM_172920    | 2.89 |      |
| 213 | Mettl1        | NM_010792    | 2.87 |      |
| 214 | Stox2         | NM_175162    | 2.85 |      |
| 215 | Klf6          | NM_011803    | 2.85 | 1    |
| 216 | Rhoc          | NM_007484    | 2.84 | 3    |
| 217 | 2500002L14Rik | NM_025607    | 2.84 |      |
| 218 | Rfxdc2        | NM_001033536 | 2.83 | 1    |
| 219 | Nmt1          | NM_008707    | 2.83 |      |
| 220 | Fkbp11        | NM_024169    | 2.81 | 2    |
| 221 | Klhl28        | NM_025707    | 2.81 |      |
| 222 | Srm           | NM_009272    | 2.81 |      |
| 223 | Grn           | NM_008175    | 2.81 |      |
| 224 | Erdr1         | NM_133362    | 2.80 |      |
| 225 | Ormdl2        | NM_024180    | 2.79 |      |
| 226 | Stat3         | NM_011486    | 2.78 | 1, 7 |
| 227 | Ctnn          | NM_007803    | 2.76 |      |
| 228 | Tmem45a       | NM_019631    | 2.76 |      |
| 229 | Copz1         | NM_019817    | 2.75 |      |
| 230 | Man1a         | NM_008548    | 2.74 | 7    |
| 231 | H2-Ke6        | NM_013543    | 2.72 | 7    |
| 232 | Enah          | NM_001083120 | 2.68 |      |
| 233 | Fn1           | NM_010233    | 2.68 | 7    |
| 234 | Os9           | NM_177614    | 2.67 |      |
| 235 | Acot9         | NM_019736    | 2.67 |      |
| 236 | Gclc          | NM_010295    | 2.66 | 4    |
| 237 | Med19         | NM_025885    | 2.66 |      |
| 238 | Ptpre         | NM_011212    | 2.64 |      |
| 239 | Itga7         | NM_008398    | 2.64 |      |
| 240 | Junb          | NM_008416    | 2.64 | 1    |
| 241 | Nfil3         | NM_017373    | 2.64 | 1    |
| 242 | Apex1         | NM_009687    | 2.63 |      |
| 243 | Slc35b4       | NM_021435    | 2.63 |      |
| 244 | Cyb5r1        | NM_028057    | 2.60 |      |
| 245 | Nme6          | NM_018757    | 2.59 |      |
| 246 | 1200002N14Rik | NM_027878    | 2.57 |      |
| 247 | Bmpr2         | NM_007561    | 2.57 |      |

|     |               |              |      |      |
|-----|---------------|--------------|------|------|
| 248 | Odc1          | NM_013614    | 2.57 |      |
| 249 | Pja2          | NM_001025309 | 2.57 |      |
| 250 | Cdr2          | NM_007672    | 2.56 |      |
| 251 | Ras11b        | NM_026878    | 2.54 | 3    |
| 252 | Sec11a        | NM_019951    | 2.53 | #    |
| 253 | H47           | NM_024439    | 2.52 | #    |
| 254 | Rbm25         | NM_025930    | 2.52 |      |
| 255 | Wdr23         | NM_133734    | 2.52 |      |
| 256 | Trove2        | NM_013835    | 2.51 |      |
| 257 | Nip7          | NM_025391    | 2.51 |      |
| 258 | Heatr5a       | NM_177171    | 2.51 |      |
| 259 | Ppox          | NM_008911    | 2.51 |      |
| 260 | Smurf2        | NM_025481    | 2.51 |      |
| 261 | Slc39a14      | NM_144808    | 2.50 |      |
| 262 | Rap2a         | NM_029519    | 2.49 | 3    |
| 263 | Fosl2         | NM_008037    | 2.48 | 1    |
| 264 | 2010111I01Rik | NM_028079    | 2.48 |      |
| 265 | Atp2b1        | NM_026482    | 2.48 | 7    |
| 266 | Rap2b         | NM_028712    | 2.45 | 3    |
| 267 | Ywhaz         | NM_011740    | 2.45 |      |
| 268 | Gmppb         | NM_177910    | 2.44 |      |
| 269 | Rhoa          | NM_016802    | 2.44 | 3    |
| 270 | Herpud1       | NM_022331    | 2.43 | 2, * |
| 271 | Incenp        | NM_016692    | 2.41 |      |
| 272 | Ehd4          | NM_133838    | 2.40 |      |
| 273 | 3110082I17Rik | NM_028469    | 2.40 |      |
| 274 | 3110050N22Rik | NM_173181    | 2.40 |      |
| 275 | Slc2a1        | NM_011400    | 2.39 |      |
| 276 | Klh2          | NM_178633    | 2.39 |      |
| 277 | Ngdn          | NM_026890    | 2.38 |      |
| 278 | Nol10         | NM_001008421 | 2.37 |      |
| 279 | Ing1          | NM_011919    | 2.37 | 1    |
| 280 | Mafk          | NM_010757    | 2.37 | 1    |
| 281 | Mvp           | NM_080638    | 2.36 |      |
| 282 | Tbccd1        | NM_001081368 | 2.36 |      |
| 283 | Rhobtb3       | NM_028493    | 2.36 |      |
| 284 | LOC433749     | XM_485435    | 2.36 | 3    |
| 285 | Cldnd1        | NM_171826    | 2.34 |      |
| 286 | Centg2        | NM_001037136 | 2.34 | 3    |
| 287 | Pdap1         | NM_001033313 | 2.34 |      |
| 288 | Pdc6ip        | NM_011052    | 2.33 |      |
| 289 | Pacsin3       | NM_028733    | 2.33 |      |
| 290 | 2310061F22Rik | NM_153775    | 2.33 |      |
| 291 | Klf7          | NM_033563    | 2.33 | 1    |
| 292 | Nucks1        | NM_175294    | 2.33 |      |
| 293 | Gcs1          | NM_020619    | 2.32 | 7    |
| 294 | Lrrc3b        | NM_146052    | 2.32 |      |
| 295 | St6galnac4    | NM_011373    | 2.32 |      |
| 296 | Dysf          | NM_001077694 | 2.32 |      |
| 297 | Fkbp2         | NM_008020    | 2.32 | 2    |

|     |               |              |      |      |
|-----|---------------|--------------|------|------|
| 298 | 2310076L09Rik | NM_025874    | 2.30 |      |
| 299 | Snurf         | NM_033174    | 2.30 |      |
| 300 | Gprk5         | NM_018869    | 2.28 |      |
| 301 | Sec22b        | NM_011342    | 2.27 |      |
| 302 | 1700025G04Rik | NM_197990    | 2.26 |      |
| 303 | Arl4c         | NM_177305    | 2.26 | 3    |
| 304 | Dynll1        | NM_019682    | 2.26 |      |
| 305 | Gars          | NM_180678    | 2.25 |      |
| 306 | AA536743      | NM_145923    | 2.24 |      |
| 307 | A130040M12Rik | NR_002860    | 2.24 |      |
| 308 | Anxa5         | NM_009673    | 2.23 |      |
| 309 | Mrps18b       | NM_025878    | 2.23 |      |
| 310 | Stt3b         | NM_024222    | 2.23 |      |
| 311 | Tgfb2         | NM_009367    | 2.22 | 5, 6 |
| 312 | Pde4b         | NM_019840    | 2.22 |      |
| 313 | Rab6          | NM_024287    | 2.21 | 3    |
| 314 | Akap2         | NM_001035532 | 2.21 |      |
| 315 | Lrrc59        | NM_133807    | 2.21 |      |
| 316 | Cnot6         | NM_212484    | 2.21 | 1    |
| 317 | Fads3         | NM_021890    | 2.21 |      |
| 318 | Lipa          | NM_021460    | 2.21 |      |
| 319 | Rab20         | NM_011227    | 2.21 | 3    |
| 320 | Slc6a6        | NM_009320    | 2.21 |      |
| 321 | Cfl1          | NM_007687    | 2.20 |      |
| 322 | Rnf4          | NM_011278    | 2.20 | 1    |
| 323 | Cugbp2        | NM_010160    | 2.19 |      |
| 324 | Ddx54         | NM_028041    | 2.19 | 1    |
| 325 | Zbtb44        | NM_172765    | 2.19 | 1    |
| 326 | Alg8          | NM_199035    | 2.18 |      |
| 327 | Adamts15      | NM_001024139 | 2.18 |      |
| 328 | Fkbp7         | NM_010222    | 2.16 | 2    |
| 329 | Calm1         | NM_009790    | 2.16 |      |
| 330 | Polr1e        | NM_022811    | 2.15 |      |
| 331 | A230046K03Rik | NM_001033375 | 2.15 |      |
| 332 | Wdr57         | NM_025645    | 2.14 |      |
| 333 | Stmn1         | NM_019641    | 2.14 |      |
| 334 | Tln1          | NM_011602    | 2.14 |      |
| 335 | Sertad3       | NM_133210    | 2.14 | 1, 6 |
| 336 | Tmem57        | NM_025382    | 2.14 |      |
| 337 | Prr13         | NM_025385    | 2.14 |      |
| 338 | Cds2          | NM_138651    | 2.13 |      |
| 339 | Cib1          | NM_011870    | 2.13 |      |
| 340 | Slc26a2       | NM_007885    | 2.12 |      |
| 341 | Nol5a         | NM_024193    | 2.12 |      |
| 342 | Sfrs9         | NM_025573    | 2.12 |      |
| 343 | Ppp1r12a      | NM_027892    | 2.11 |      |
| 344 | Rrbp1         | NM_024281    | 2.11 |      |
| 345 | Ppap2a        | NM_008247    | 2.11 | 6    |
| 346 | Pik3cb        | NM_029094    | 2.11 |      |
| 347 | Tor1aip2      | NM_172843    | 2.11 |      |



|     |               |              |      |   |
|-----|---------------|--------------|------|---|
| 348 | Spryd3        | NM_001033277 | 2.11 |   |
| 349 | Heatr5b       | NM_001081179 | 2.11 |   |
| 350 | Ralb          | NM_022327    | 2.11 | 3 |
| 351 | Dnaja4        | NM_021422    | 2.11 | 2 |
| 352 | Tgm2          | NM_009373    | 2.11 |   |
| 353 | Actl6a        | NM_019673    | 2.10 | 1 |
| 354 | Rpl14         | NM_025974    | 2.09 |   |
| 355 | Srxn1         | NM_029688    | 2.08 |   |
| 356 | Tubb5         | NM_011655    | 2.08 |   |
| 357 | Psm11         | NM_178616    | 2.07 |   |
| 358 | D17Wsu104e    | NM_080837    | 2.06 |   |
| 359 | Gna13         | NM_010303    | 2.06 |   |
| 360 | Rrad          | NM_019662    | 2.06 | 3 |
| 361 | Taldo1        | NM_011528    | 2.06 | 7 |
| 362 | Fstl1         | NM_008047    | 2.06 |   |
| 363 | Pabpn1        | NM_019402    | 2.06 |   |
| 364 | Ap2b1         | NM_001035854 | 2.06 |   |
| 365 | Stip1         | NM_016737    | 2.05 |   |
| 366 | Rps27l        | NM_026467    | 2.05 |   |
| 367 | Sdc2          | NM_008304    | 2.05 |   |
| 368 | 1110019N10Rik | NM_026753    | 2.05 |   |
| 369 | Wdr1          | NM_011715    | 2.05 |   |
| 370 | Popdc3        | NM_024286    | 2.04 |   |
| 371 | 2310037I24Rik | NM_133714    | 2.04 |   |
| 372 | Ccdc86        | NM_023731    | 2.04 |   |
| 373 | Crls1         | NM_001024385 | 2.04 |   |
| 374 | Tfg           | NM_019678    | 2.04 |   |
| 375 | Tial1         | NM_009383    | 2.03 |   |
| 376 | Rwdd4a        | NM_203507    | 2.03 |   |
| 377 | Smad2         | NM_010754    | 2.03 | 1 |
| 378 | 5730446C15Rik | NM_146096    | 2.01 |   |
| 379 | BB271151      | ---          | 2.01 |   |
| 380 | Dusp27        | NM_001033344 | 2.01 |   |
| 381 | Siah2         | NM_009174    | 2.00 |   |
| 382 | Ifngr2        | NM_008338    | 0.50 |   |
| 383 | Tmed1         | NM_010744    | 0.50 |   |
| 384 | Epha4         | NM_007936    | 0.50 |   |
| 385 | Enpp5         | NM_032003    | 0.50 | 7 |
| 386 | Galm          | NM_176963    | 0.50 |   |
| 387 | B3gatl1       | NM_001081204 | 0.49 |   |
| 388 | Cd59a         | NM_007652    | 0.49 |   |
| 389 | Rtn4ip1       | NM_130892    | 0.49 |   |
| 390 | Klhl24        | NM_029436    | 0.49 |   |
| 391 | Cog6          | NM_026225    | 0.49 |   |
| 392 | Thrsp         | NM_009381    | 0.49 |   |
| 393 | Fgf9          | NM_013518    | 0.49 |   |
| 394 | Ccdc21        | NM_144527    | 0.49 |   |
| 395 | Jam2          | NM_023844    | 0.49 |   |
| 396 | Aig1          | NM_025446    | 0.49 |   |
| 397 | Clasp2        | NM_001081960 | 0.49 |   |

|     |               |              |      |   |
|-----|---------------|--------------|------|---|
| 398 | Ppm1k         | NM_175523    | 0.49 |   |
| 399 | Mitf          | NM_008601    | 0.48 | 1 |
| 400 | Rhobtb1       | NM_001081347 | 0.48 | 3 |
| 401 | Entpd5        | NM_001026214 | 0.48 |   |
| 402 | 2810405K02Rik | NM_025582    | 0.48 |   |
| 403 | Auh           | NM_016709    | 0.48 | 7 |
| 404 | Peci          | NM_011868    | 0.48 | 7 |
| 405 | Wdr33         | NM_028866    | 0.47 |   |
| 406 | Lmod2         | NM_053098    | 0.47 |   |
| 407 | Clip4         | NM_030179    | 0.47 |   |
| 408 | Ppil1         | NM_026845    | 0.47 | 2 |
| 409 | Magi2         | XM_001000863 | 0.46 |   |
| 410 | B3gnt1        | NM_175383    | 0.46 |   |
| 411 | 3110002H16Rik | NM_029623    | 0.46 |   |
| 412 | Pigy          | NM_025574    | 0.46 |   |
| 413 | C030044B11Rik | XM_980322    | 0.46 |   |
| 414 | Lpl           | NM_008509    | 0.46 |   |
| 415 | Art3          | NM_181728    | 0.46 |   |
| 416 | 4430402I18Rik | NM_198651    | 0.46 |   |
| 417 | Ctsh          | NM_007801    | 0.46 |   |
| 418 | Sepp1         | NM_001042613 | 0.45 |   |
| 419 | Clybl         | NM_029556    | 0.45 |   |
| 420 | Klhdc1        | NM_178253    | 0.45 |   |
| 421 | Pex11a        | NM_011068    | 0.45 |   |
| 422 | 1810014F10Rik | NM_026928    | 0.45 |   |
| 423 | Cbr1          | NM_007620    | 0.45 | 7 |
| 424 | 2410012H22Rik | XM_126343    | 0.45 |   |
| 425 | Hod           | NM_175606    | 0.45 | 1 |
| 426 | Plekhb2       | NM_145516    | 0.45 |   |
| 427 | Ablim1        | NM_178688    | 0.45 |   |
| 428 | Decr1         | NM_026172    | 0.45 | 7 |
| 429 | Ccni          | NM_017367    | 0.45 |   |
| 430 | Mgst3         | NM_025569    | 0.45 |   |
| 431 | Coq3          | NM_172687    | 0.44 | 7 |
| 432 | Gstt1         | NM_008185    | 0.44 |   |
| 433 | 2210016H18Rik | ---          | 0.44 |   |
| 434 | Apod          | NM_007470    | 0.44 |   |
| 435 | AV347904      | ---          | 0.44 |   |
| 436 | Grb14         | NM_016719    | 0.44 |   |
| 437 | Vapb          | NM_019806    | 0.44 |   |
| 438 | Fahd2a        | NM_029629    | 0.44 | 7 |
| 439 | Fgf1          | NM_010197    | 0.44 |   |
| 440 | Snrpn         | NM_001082961 | 0.44 |   |
| 441 | Egflam        | NM_178748    | 0.44 |   |
| 442 | Pcbd2         | NM_028281    | 0.44 |   |
| 443 | Ptpn3         | NM_011207    | 0.44 |   |
| 444 | Bckdhb        | NM_199195    | 0.43 |   |
| 445 | Echs1         | NM_053119    | 0.43 | 7 |
| 446 | 1810015C04Rik | NM_001034851 | 0.43 |   |
| 447 | Hrasls        | NM_013751    | 0.43 |   |

|     |               |              |      |      |
|-----|---------------|--------------|------|------|
| 448 | Neo1          | NM_001042752 | 0.43 |      |
| 449 | Pex19         | NM_023041    | 0.43 |      |
| 450 | Hlf           | NM_172563    | 0.42 | 1    |
| 451 | Atp6v0e2      | NM_133764    | 0.42 |      |
| 452 | Mcee          | NM_028626    | 0.42 |      |
| 453 | Pitpnc1       | NM_145823    | 0.42 |      |
| 454 | Mettl7a       | NM_027334    | 0.42 | 7    |
| 455 | Ppargc1a      | NM_008904    | 0.42 | 1, 7 |
| 456 | Ociad2        | NM_026950    | 0.41 |      |
| 457 | Slc25a11      | NM_024211    | 0.41 |      |
| 458 | Adi1          | NM_134052    | 0.41 |      |
| 459 | Crbn          | NM_021449    | 0.41 |      |
| 460 | BB133024      | ---          | 0.41 |      |
| 461 | Slc25a13      | NM_015829    | 0.41 |      |
| 462 | Trmt5         | NM_029580    | 0.41 |      |
| 463 | 2310061I04Rik | XM_001000601 | 0.41 |      |
| 464 | Ccrl2         | NM_017466    | 0.41 |      |
| 465 | Dnaja2        | NM_019794    | 0.41 | 2    |
| 466 | Stom          | NM_013515    | 0.41 |      |
| 467 | EG270335      | XM_001003067 | 0.41 |      |
| 468 | Sirt5         | NM_178848    | 0.40 | 1    |
| 469 | Bche          | NM_009738    | 0.40 |      |
| 470 | Pank1         | NM_023792    | 0.40 |      |
| 471 | Myh6          | NM_010856    | 0.40 |      |
| 472 | Gramd1b       | NM_172768    | 0.40 |      |
| 473 | Mrpl49        | NM_026246    | 0.40 |      |
| 474 | Cyt11         | NM_001081106 | 0.39 |      |
| 475 | Tarsl2        | NM_172310    | 0.39 |      |
| 476 | Slc22a5       | NM_011396    | 0.39 |      |
| 477 | Cabc1         | NM_023341    | 0.39 | 1    |
| 478 | Cog8          | NM_139229    | 0.38 |      |
| 479 | Asb11         | NM_026853    | 0.38 |      |
| 480 | Etfdh         | NM_025794    | 0.38 |      |
| 481 | Amacr         | NM_008537    | 0.37 | 7    |
| 482 | EG434402      | XM_917134    | 0.37 |      |
| 483 | D930026N18Rik | ---          | 0.37 |      |
| 484 | Slc40a1       | NM_016917    | 0.37 |      |
| 485 | Siae          | NM_011734    | 0.37 |      |
| 486 | Prei4         | NM_001042671 | 0.36 |      |
| 487 | Acs11         | NM_007981    | 0.36 | 7    |
| 488 | Dpep1         | NM_007876    | 0.36 |      |
| 489 | Sesn1         | NM_001013370 | 0.36 |      |
| 490 | Asrgl1        | NM_025610    | 0.36 |      |
| 491 | Mfsd4         | NM_172510    | 0.36 |      |
| 492 | Nit2          | NM_023175    | 0.36 |      |
| 493 | D930001I22Rik | NM_173397    | 0.36 |      |
| 494 | Pfkfb1        | NM_008824    | 0.35 | 7    |
| 495 | Ak3           | NM_021299    | 0.35 |      |
| 496 | Agl           | NM_001081326 | 0.34 |      |
| 497 | Vldlr         | NM_013703    | 0.34 |      |

|     |               |              |      |   |
|-----|---------------|--------------|------|---|
| 498 | Gpd1          | NM_010271    | 0.34 | 7 |
| 499 | Nqo2          | NM_020282    | 0.34 |   |
| 500 | BE952563      | ---          | 0.34 |   |
| 501 | Acot11        | NM_025590    | 0.34 | 7 |
| 502 | Retsat        | NM_026159    | 0.34 |   |
| 503 | Tfdp2         | NM_178667    | 0.34 | 1 |
| 504 | 1100001H23Rik | NM_025806    | 0.33 |   |
| 505 | A2bp1         | NM_021477    | 0.33 |   |
| 506 | Ccdc69        | NM_177471    | 0.33 |   |
| 507 | Myot          | NM_001033621 | 0.33 |   |
| 508 | Slc46a3       | NM_027872    | 0.32 |   |
| 509 | Ndufs4        | NM_010887    | 0.32 |   |
| 510 | 4930534B04Rik | NM_181815    | 0.32 |   |
| 511 | Nmnat1        | NM_133435    | 0.32 |   |
| 512 | Sgcg          | NM_011892    | 0.32 |   |
| 513 | Ednra         | NM_010332    | 0.32 | 7 |
| 514 | Ctf1          | NM_007795    | 0.31 |   |
| 515 | Lrrc27        | NM_027164    | 0.31 |   |
| 516 | 3632451O06Rik | NM_026142    | 0.31 |   |
| 517 | 1500001A10Rik | NM_026886    | 0.31 |   |
| 518 | Cpt2          | NM_009949    | 0.31 | 7 |
| 519 | Sfxn4         | NM_053198    | 0.31 |   |
| 520 | Pxmp2         | NM_008993    | 0.31 |   |
| 521 | Cutc          | NM_025530    | 0.31 |   |
| 522 | ORF28         | NM_138664    | 0.30 | 2 |
| 523 | 4930481A15Rik | XM_980129    | 0.30 |   |
| 524 | 2310014G06Rik | NM_001082975 | 0.30 |   |
| 525 | Hadh          | NM_008212    | 0.30 | 7 |
| 526 | Sord          | NM_146126    | 0.30 |   |
| 527 | Rasl2-9       | NM_009028    | 0.29 | 3 |
| 528 | Mterfd3       | NM_028832    | 0.29 | 1 |
| 529 | Aldh5a1       | NM_172532    | 0.29 | 7 |
| 530 | Nr0b2         | NM_011850    | 0.29 | 1 |
| 531 | Slc16a10      | NM_028247    | 0.29 |   |
| 532 | Slc25a20      | NM_020520    | 0.29 |   |
| 533 | 4833417J20Rik | ---          | 0.28 |   |
| 534 | Ucp3          | NM_009464    | 0.27 | 7 |
| 535 | Asb15         | NM_080847    | 0.27 | 1 |
| 536 | C730029A08Rik | ---          | 0.27 |   |
| 537 | 1700040L02Rik | NM_028491    | 0.26 |   |
| 538 | BQ175377      | ---          | 0.25 |   |
| 539 | Rasl10b       | NM_001013386 | 0.25 | 3 |
| 540 | Slc25a20      | NM_020520    | 0.25 |   |
| 541 | Asb2          | NM_023049    | 0.25 | 1 |
| 542 | Tbl1xr1       | NM_030732    | 0.25 | 1 |
| 543 | Rxrg          | NM_009107    | 0.25 | 1 |
| 544 | Slc27a1       | NM_011977    | 0.25 | 7 |
| 545 | Itgb1bp2      | NM_013712    | 0.25 |   |
| 546 | Fndc5         | NM_027402    | 0.24 |   |
| 547 | Acy3          | NM_027857    | 0.24 | 7 |

|     |               |              |      |      |
|-----|---------------|--------------|------|------|
| 548 | AW989410      | ---          | 0.24 |      |
| 549 | Nudt7         | NM_024437    | 0.24 |      |
| 550 | Tcea3         | NM_011542    | 0.24 | 1    |
| 551 | Herpud2       | NM_020586    | 0.23 | 2, * |
| 552 | A530016L24Rik | NM_177039    | 0.23 |      |
| 553 | Asb10         | NM_080444    | 0.23 | 1    |
| 554 | Asb15         | NM_080847    | 0.23 |      |
| 555 | 1110034G24Rik | XM_001000361 | 0.23 |      |
| 556 | 1700025K23Rik | NM_183254    | 0.23 |      |
| 557 | Sgca          | NM_009161    | 0.23 |      |
| 558 | Atp1a2        | NM_178405    | 0.23 | 7    |

|     |               |              |      |      |
|-----|---------------|--------------|------|------|
| 559 | Acot1         | NM_012006    | 0.23 |      |
| 560 | Csdc2         | NM_145473    | 0.22 | 1    |
| 561 | Lrg1          | NM_029796    | 0.22 |      |
| 562 | Gzmm          | NM_008504    | 0.22 |      |
| 563 | Btbd2         | XM_001000710 | 0.22 |      |
| 564 | Kcnj11        | NM_010602    | 0.22 |      |
| 565 | Rad23a        | NM_009010    | 0.21 |      |
| 566 | Wipf3         | XM_620310    | 0.21 |      |
| 567 | Ephx2         | NM_007940    | 0.21 | 7    |
| 568 | Gdpd1         | NM_025638    | 0.20 |      |
| 569 | Hhatl         | NM_029095    | 0.20 |      |
| 570 | Gstk1         | NM_029555    | 0.20 |      |
| 571 | Selenbp1      | NM_009150    | 0.20 |      |
| 572 | Adssl1        | NM_007421    | 0.20 |      |
| 573 | Cutl2         | NM_007804    | 0.20 | 1    |
| 574 | Fblim1        | NM_133754    | 0.20 |      |
| 575 | Tbc1d10c      | NM_178650    | 0.19 |      |
| 576 | Fah           | NM_010176    | 0.19 | 1, 7 |
| 577 | Wdr21         | NM_030246    | 0.19 |      |
| 578 | Asb14         | NM_080856    | 0.19 |      |
| 579 | Mlycd         | NM_019966    | 0.19 | 7    |
| 580 | Mme           | NM_008604    | 0.19 |      |
| 581 | Art4          | NM_026639    | 0.19 |      |
| 582 | Kcnv2         | NM_183179    | 0.18 |      |
| 583 | D2hgdh        | NM_178882    | 0.18 |      |
| 584 | Frem2         | NM_172862    | 0.17 |      |
| 585 | Cmbl          | NM_181588    | 0.17 |      |
| 586 | 2310076L09Rik | NM_001077348 | 0.17 |      |
| 587 | Aldob         | NM_144903    | 0.17 | 7    |
| 588 | Oplah         | NM_153122    | 0.16 |      |
| 589 | Fbp2          | NM_007994    | 0.16 | 7    |
| 590 | Ces3          | NM_053200    | 0.16 |      |
| 591 | Art1          | NM_009710    | 0.16 |      |
| 592 | Inmt          | NM_009349    | 0.15 |      |
| 593 | Cmtm8         | NM_027294    | 0.14 |      |
| 594 | Lrtm1         | NM_176920    | 0.14 |      |
| 595 | Impa2         | NM_053261    | 0.14 |      |
| 596 | Ky            | NM_024291    | 0.14 |      |
| 597 | P2ry1         | NM_008772    | 0.12 |      |
| 598 | BB515119      | ---          | 0.11 |      |
| 599 | 2310010M20Rik | NM_183283    | 0.11 |      |
| 600 | Pdlim4        | NM_019417    | 0.10 |      |
| 601 | C730027J19Rik | NM_178758    | 0.10 | 7    |
| 602 | Klf15         | NM_023184    | 0.09 | 1,7  |
| 603 | Ogdh          | NM_010956    | 0.08 | 7    |
| 604 | Apba3         | NM_001081208 | 0.08 |      |
| 605 | Tll1          | NM_178869    | 0.06 |      |
| 606 | Slc25a34      | NM_001013780 | 0.06 |      |
| 607 | Fn3k          | NM_001038699 | 0.03 |      |
